# Supplementary material for: Highly microporous graphite-like BCxO3−x/C nanospheres for anode materials of lithium-ion batteries
Source: Royal Society of Chemistry journal article supplement (doi:10.1039/c6ta10778h), 2017-01-01
Supplement: c6ta10778h1.pdf [file c6ta10778h1.pdf]

## **Highly microporous graphite-like $\text{BC}_x\text{O}_{3-x}/\text{C}$ nanospheres for anode material of lithium-ion batteries**

Huiqi Wang <sup>1,2\*</sup>, Ying Li <sup>1,2</sup>, Yanzhong Wang <sup>1,2</sup>, Shengliang Hu <sup>1,2\*</sup>, Hua Hou <sup>1</sup>

<sup>1</sup> *School of Materials Science and Engineering, North University of China, Taiyuan  
030051, China*

<sup>2</sup> *Shanxi Province Key Laboratory of Functional Nanocomposites, Taiyuan 030051,  
China*

---

\*Corresponding author. Tel.: +86-351-4084106; fax: +86-351-4083952.  
E-mail address: hqiwang@163.com (H. Wang). hsliang@yeah.net (S. Hu)

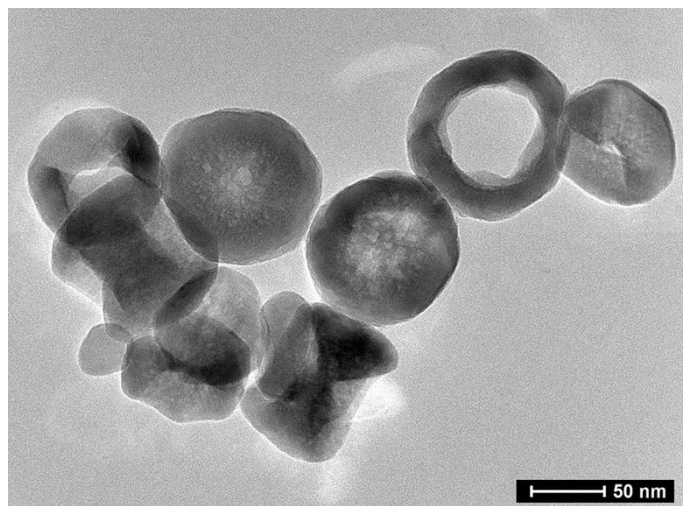

Figure S1 TEM image of the UBC obtained at the same conditions.

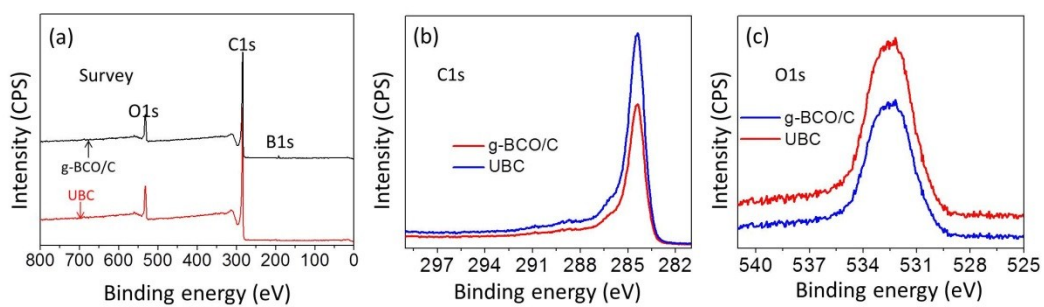

Figure S2 The Survey XPS (a), C1s peak (b) and O1s peak (c) of g-BCO and UBC.
